# Supplementary material
Source: PubMed Central journal article supplement (PMC4040607)
Supplement: 1400295111_pnas.1400295111.sapp.pdf [file 1400295111_pnas.1400295111.sapp.pdf]

## Supporting Information

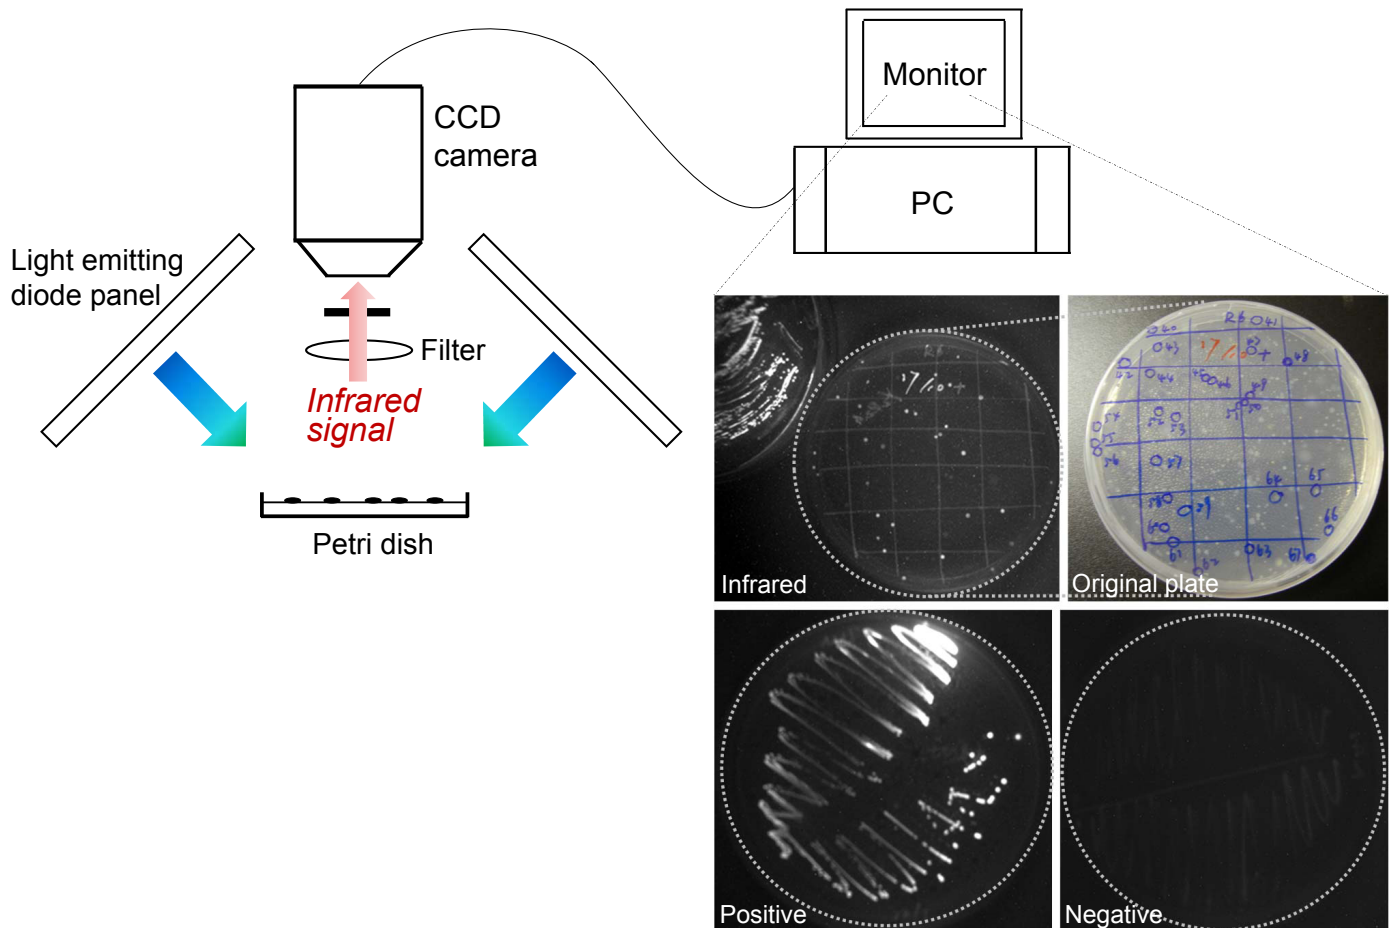

**Fig. S1 A schematic diagram of the infra-red screening system.** The principle of the detection system is based on the fact that light harvesting complexes of phototrophic organisms are excited in the blue-green spectral region (450 ~ 570 nm). The incoming light is captured by carotenoids, which instantly transfer the excitation to the bacteriochlorophyll molecules which release part of the absorbed energy in the form of infrared fluorescence. The BChl *a* autofluorescence is registered by a highly sensitive CCD camera to identify the positive colonies. Test agar plates are shown: *upper right*, a fresh  $\frac{1}{2}$  R<sub>2</sub>A agar plate with a number of colonies formed; *upper left*, imaging of the signals passing the infrared filter and captured by CCD camera after this plate was illuminated with either blue or green light; *lower right and left*, depict images of a BChl *a*-positive and a BChl *a*-negative strain, respectively.

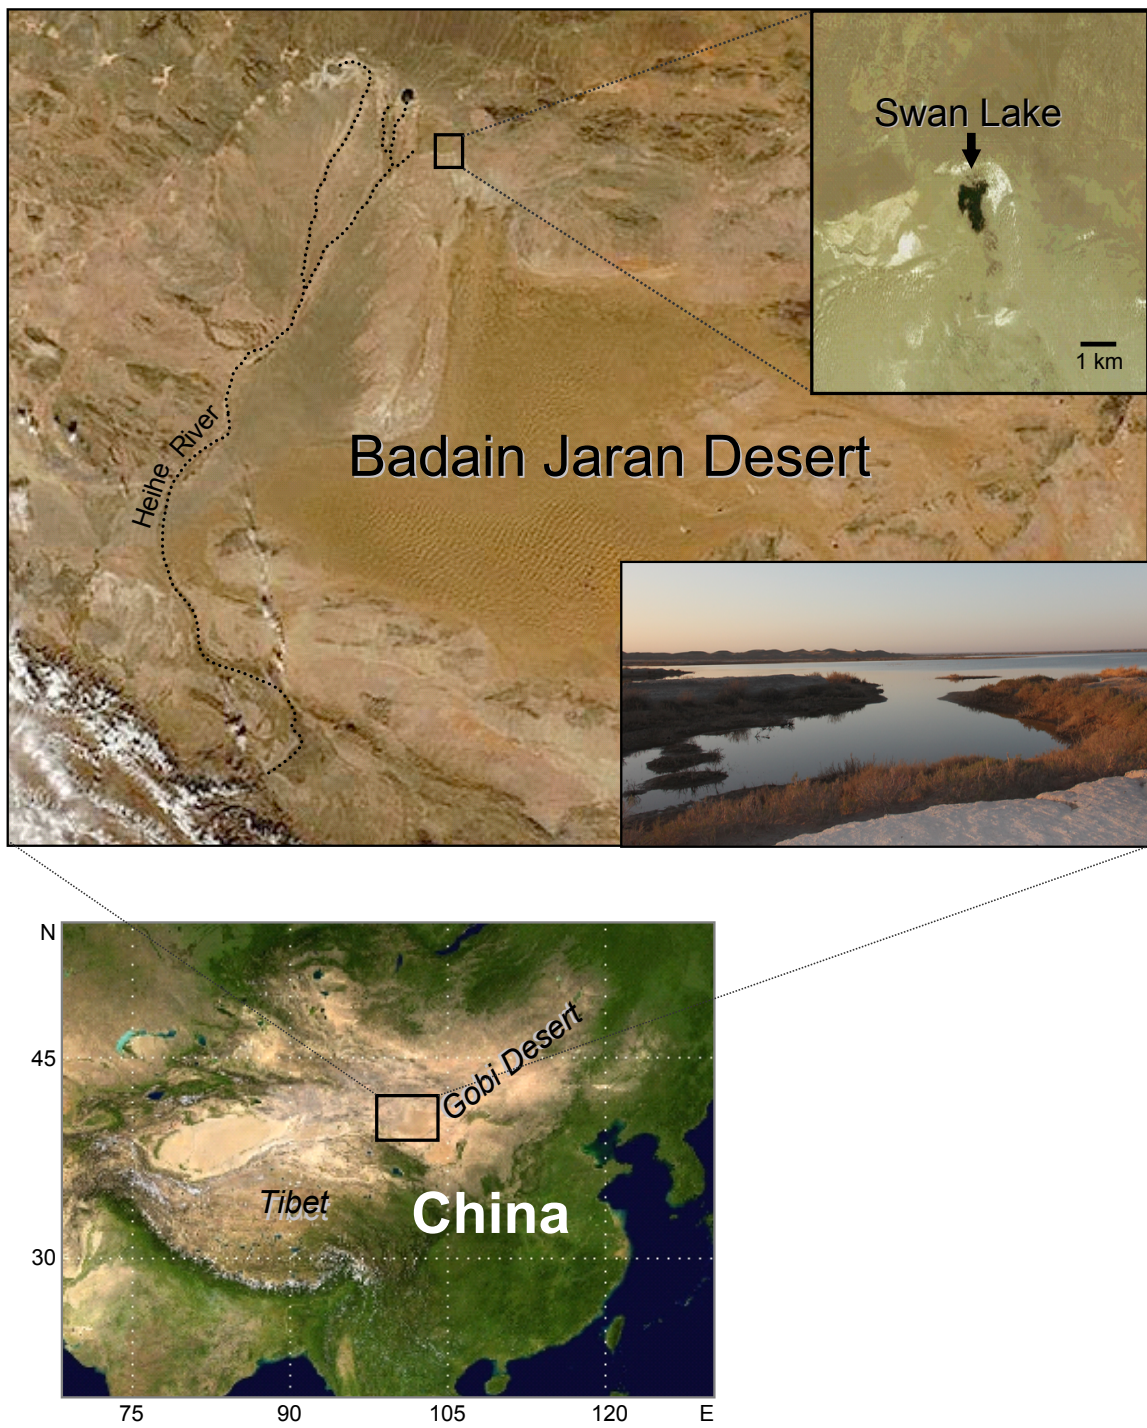

Fig. S2 Satellite images (from Google Earth) and a photograph of the Swan Lake in northern China.

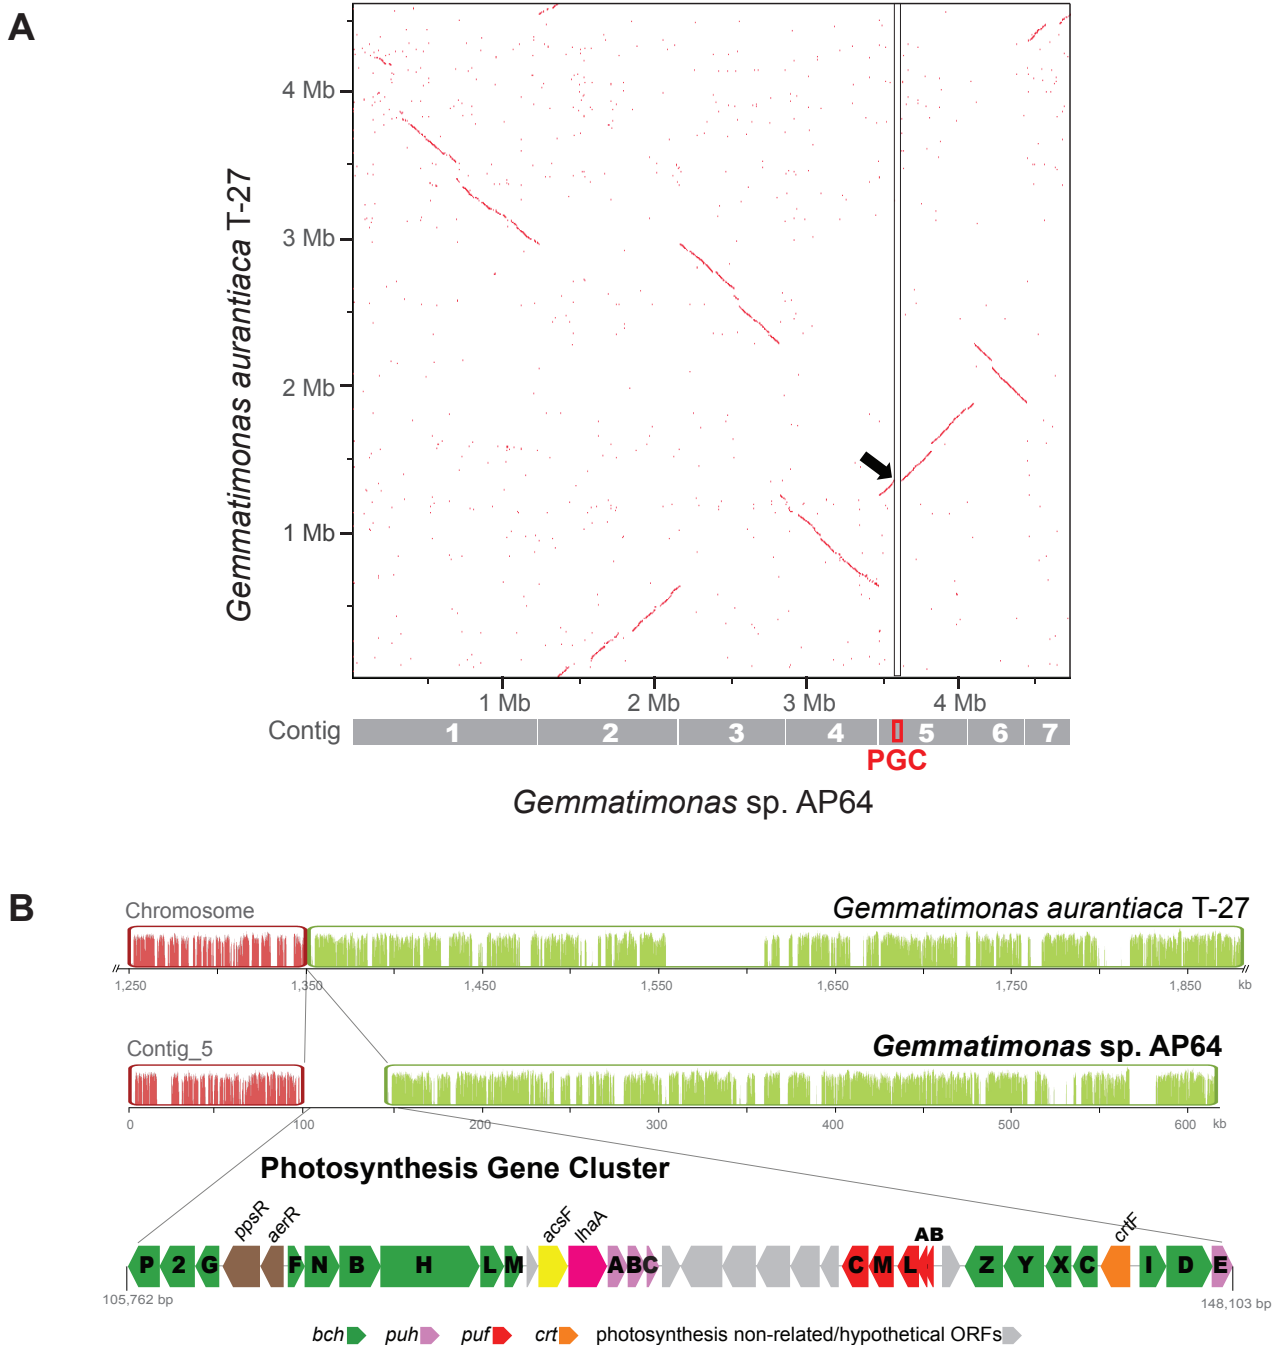

**Fig. S3 (A) Genome blast dot plot for strain AP64 and *Gemmatimonas aurantiaca* T-27.** The genome size is 4,706,869 bases for AP64 and 4,636,964 bases for T-27. Protein sequences from both genomes were compared by blastP against one another on the online RAST server and data were visualized through the SEED viewer. AP64 contigs are ordered according to their length (from the longest to the shortest). Highlighted region on the Contig\_5 is the photosynthesis gene cluster (PGC) which corresponds to the gap region on the plot marked by an arrow. The blast dots for PGC proteins are shown in dashed box. **(B) Alignment of the PGC-containing contig of AP64 with the chromosome sequence of *Gemmatimonas aurantiaca* T-27** (NCBI accession number: NC\_012489.1). Colored blocks represent syntenic regions that are presumably homologous and internally free from genomic rearrangement. Open areas within and between boxes represent the unique regions of the two organisms. Inside each box a similarity profile of the genome sequences is shown with the height corresponding to the average level of conservation in that region. *bch*, bacteriochlorophyll biosynthesis genes; *puh*, genes encoding reaction center assembly proteins; *puf*, genes encoding reaction center proteins; *crt*, carotenoid biosynthesis genes; *ppsR*, transcriptional repressor for photosynthesis genes; *aerR*, coenzyme B12-binding aerobic repressor; *acsF*, gene encoding oxygen dependent Mg-protoporphyrin IX monomethylester cyclase; *lhaA*, gene encoding light harvesting I complex assembly protein.

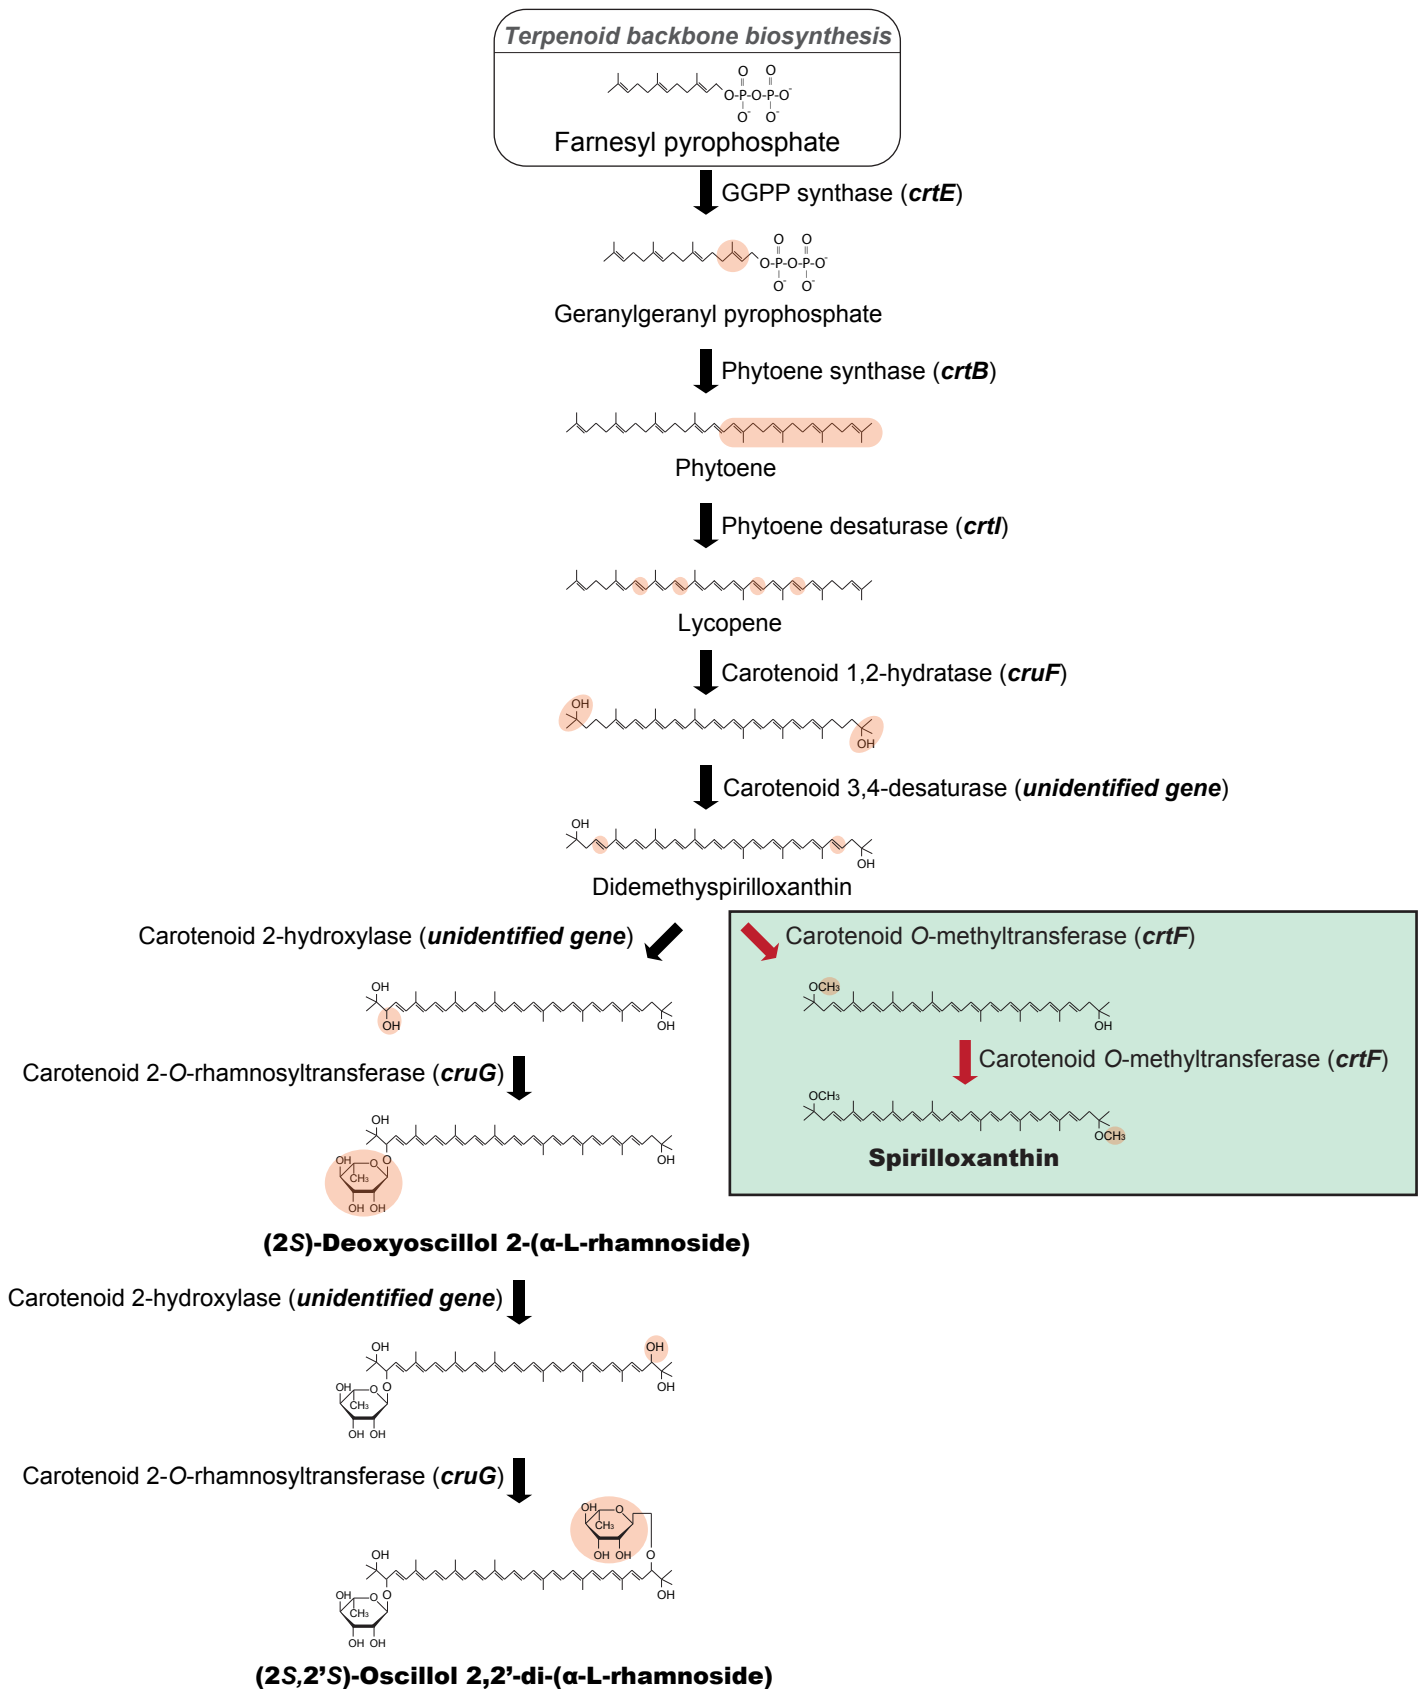

**Fig. S4 Putative carotenoid biosynthesis pathway in AP64.** The highlighted parts of each compound represent the modification sites of corresponding enzymes. The novel oscillool 2,2'-dirhamnoside biosynthesis pathway which contain two as yet unidentified genes was firstly proposed in *Gemmatimonas aurantiaca* T-27 by Takaichi *et al.* (Microbiology 2010, 156:757-763). Due to the very similar pigment (Fig. 3) and genome (Fig. S3) composition between strains AP64 and T-27, this pathway very likely exists in AP64 as well. In the highlighted box shows the proposed spirilloxanthin biosynthesis steps in AP64 catalyzed by the carotenoid *O*-methyltransferase (*crtF*) which is absent in T-27. For all carotenoid biosynthesis genes identified in the AP64 genome, see Table S6.

**A**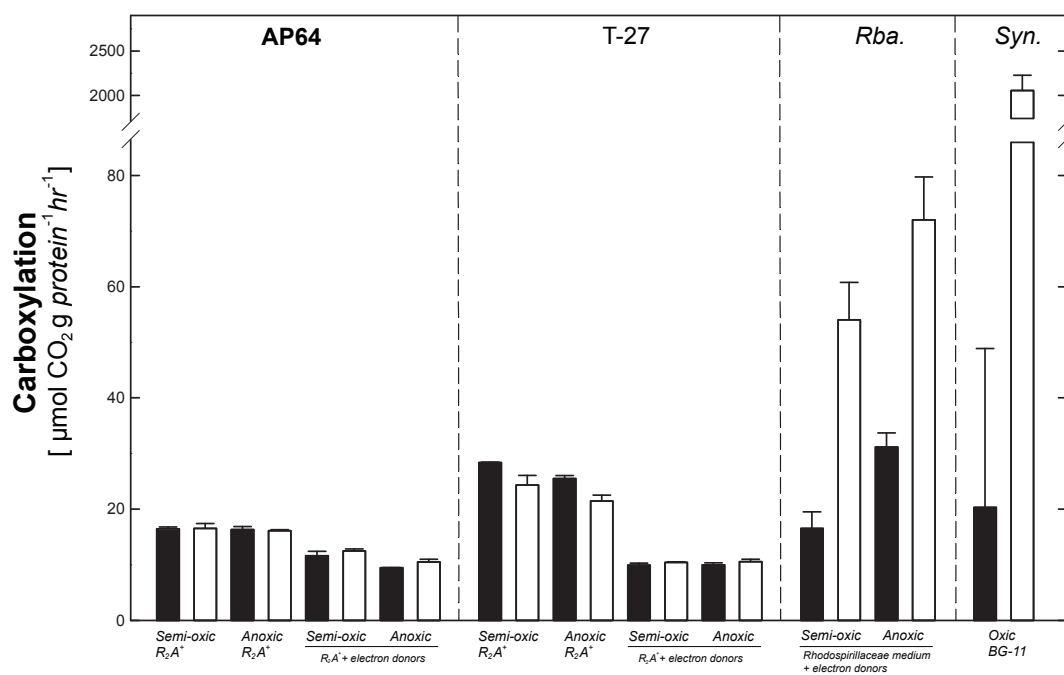**B**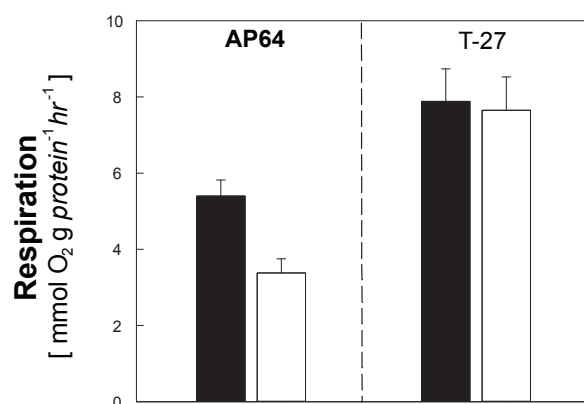

**Fig. S5 Carbon incorporation and respiration activity in AP64 cells.** (A),  $^{14}\text{C}$  labeled bicarbonate incorporation determined in AP64 cells and in various control strains. *G. aurantiaca* T-27 was used as a heterotrophic control while strains *Rhodobacter sphaeroides* DSM158 (*Rba.*) and *Synechocystis* sp. PCC6803 (*Syn.*) were employed as photoautotrophic controls. The tested growth environments were oxic for *Synechocystis* sp. PCC6803 and semi-oxic ( $\sim 120 \mu\text{M}$  oxygen)/anoxic ( $>30$  min bubbling of  $\text{N}_2$ ,  $< 1 \mu\text{M}$  oxygen) for AP64, T-27 and *Rhodobacter sphaeroides* with or without electron donors supplemented in each specific medium which are shown on the graph. Media composition is given in Table S1. *Synechocystis* sp. PCC6803 was grown in the BG-11 medium. Each medium was supplemented with 3 mM sodium bicarbonate as a source of inorganic carbon. Electron donors are 1 mM  $\text{Na}_2\text{S}$  + 1 mM  $\text{Na}_2\text{S}_2\text{O}_3$  + 1 mM  $\text{Na}_2\text{SO}_3$  for growth of AP64 and T-27 and 10 mM  $\text{Na}_2\text{S}$  + 1 mM  $\text{Na}_2\text{S}_2\text{O}_3$  for *Rba.* Error bars represent st. dev. calculated from three replicates. (B), respiration activities in AP64 (left) and in T-27 (right). Black bars, in the dark; white bars, in the light ( $150 \mu\text{mol photon m}^{-2} \text{ s}^{-1}$ ). For more details see Materials and Methods.

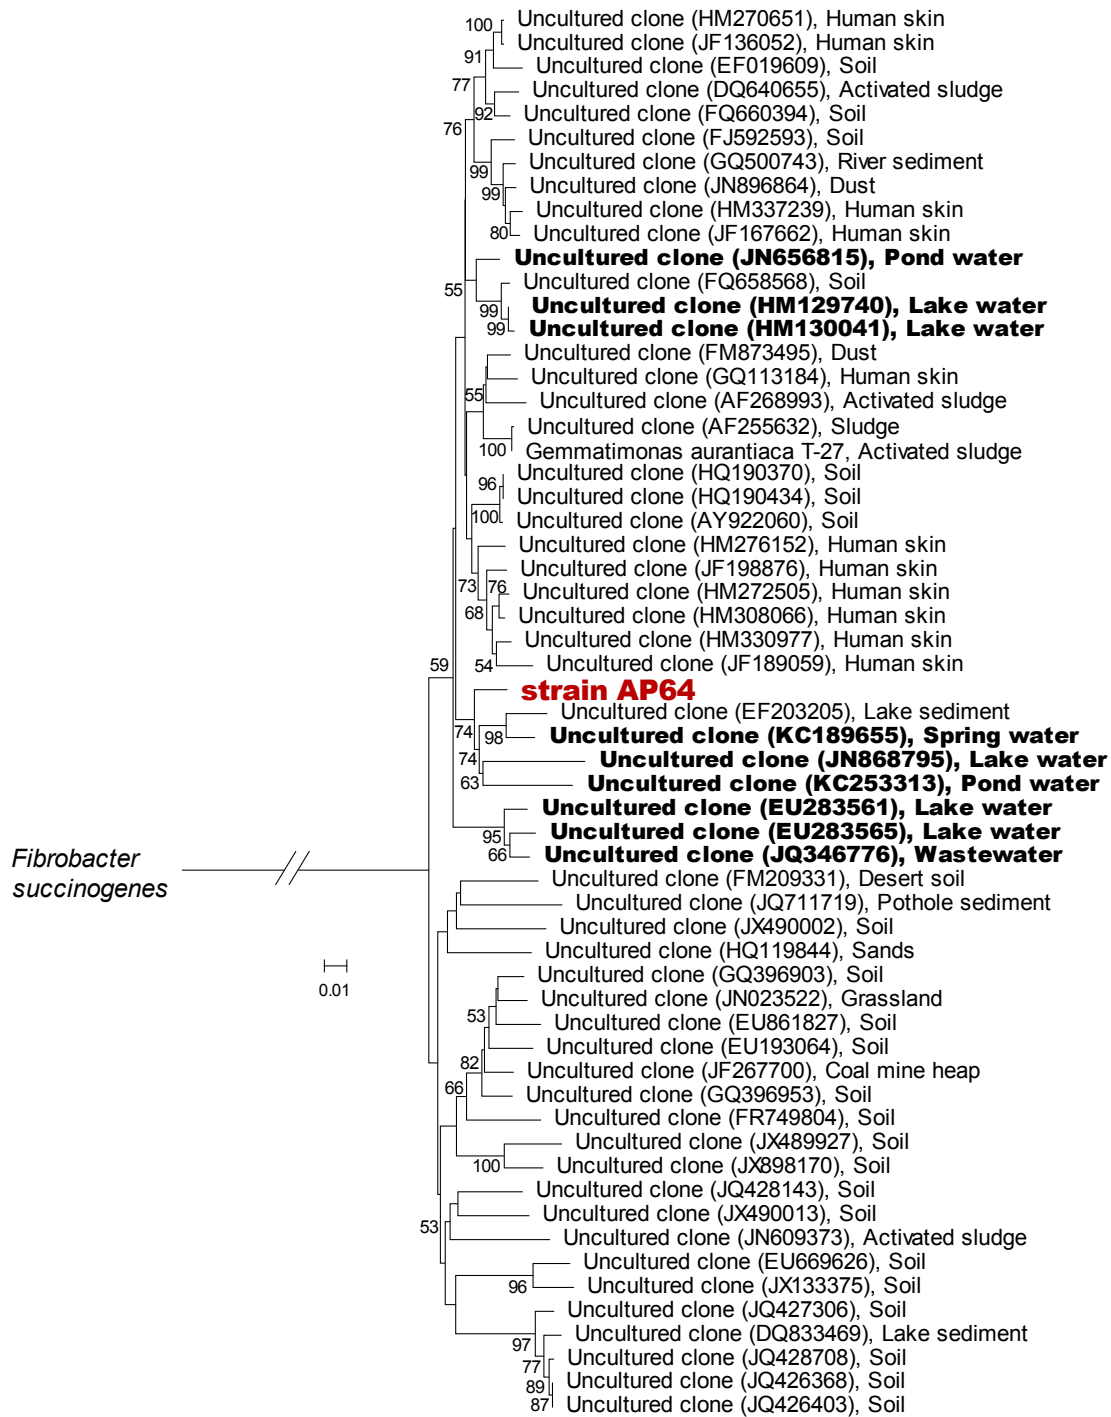

**Fig. S6** A neighbor joining tree showing the relationship of AP64's 16S rRNA gene with environmental clones. Reference sequences and associated source information was retrieved from the NCBI GenBank database with the criteria set as length greater than 1,200 bp and sequence identity not less than 95%. The 16S rRNA gene sequence of *Fibrobacter succinogenes* was used as an outgroup. Aquatic environments related clones are highlighted in bold.

**Table S1 List of media (A) and growth conditions (B) tested for strain AP64.** For all media, pH was set to 8.0 because the source lake of this strain is alkaline (pH 8.76) and a test of pH 7.5 ~ 8.5 showed no significant influence on AP64's growth. No growth was observed in a one month incubation with any of these media in liquid, and therefore AP64's growth was compared based on the amount and size of colonies formed on three-week incubated agar plates at 25 °C. -, no visible colonies formed; + to +++++, a few small colonies (diam. <0.5 mm) to a large number of normal sized colonies (diam. 1.0~2.0 mm). Each measurement was based on at least three plates. A light/dark cycle of 12 hrs/12 hrs was used with a light intensity of ~ 150 quanta m<sup>-2</sup> s<sup>-1</sup>.

(A)

| Rhodospirillaceae medium*<br>(Phototrophic growth by purple non sulfur bacteria) | R <sub>2</sub> A medium#                      |                                      | R <sub>2</sub> A <sup>+</sup> medium |             |       |                                                          |         |
|----------------------------------------------------------------------------------|-----------------------------------------------|--------------------------------------|--------------------------------------|-------------|-------|----------------------------------------------------------|---------|
|                                                                                  | (Heterotrophic growth by freshwater bacteria) | 1/2 strength                         | Full strength                        | 2x strength |       |                                                          |         |
| Yeast extract                                                                    | 0.3 g                                         | Yeast extract                        | 0.25 g                               | 0.5 g       | 1.0 g | Yeast extract                                            | 0.5 g   |
| Na <sub>2</sub> -succinate                                                       | 1.0 g                                         | Proteose peptone                     | 0.25 g                               | 0.5 g       | 1.0 g | Proteose peptone                                         | 0.5 g   |
| NH <sub>4</sub> -acetate                                                         | 0.5 g                                         | Glucose                              | 0.25 g                               | 0.5 g       | 1.0 g | Glucose                                                  | 0.5 g   |
| Fe(III) citrate solution (0.1% in H <sub>2</sub> O)                              | 5.0 mL                                        | Soluble starch                       | 0.25 g                               | 0.5 g       | 1.0 g | Soluble starch                                           | 0.5 g   |
| KH <sub>2</sub> PO <sub>4</sub>                                                  | 0.5 g                                         | Na-pyruvate                          | 0.15 g                               | 0.3 g       | 0.6 g | Na-pyruvate                                              | 0.3 g   |
| MgSO <sub>4</sub> ·7H <sub>2</sub> O                                             | 0.4 g                                         | K <sub>2</sub> HPO <sub>4</sub>      | 0.15 g                               | 0.3 g       | 0.6 g | K <sub>2</sub> HPO <sub>4</sub>                          | 0.3 g   |
| NaCl                                                                             | 0.4 g                                         | MgSO <sub>4</sub> ·7H <sub>2</sub> O | 0.025 g                              | 0.05 g      | 0.1 g | MgSO <sub>4</sub> ·7H <sub>2</sub> O                     | 0.05 g  |
| NH <sub>4</sub> Cl                                                               | 0.4 g                                         | Distilled water                      | 1.0 L                                | 1.0 L       | 1.0 L | NH <sub>4</sub> -acetate                                 | 0.05 g  |
| Ca <sub>2</sub> Cl·2H <sub>2</sub> O                                             | 0.05 g                                        |                                      |                                      |             |       | Vitamin solution<br>(refer to DSMZ medium 462)           | 1.0 mL  |
| Vitamin B12 solution<br>(10 mg in 100 mL H <sub>2</sub> O)                       | 0.4 mL                                        |                                      |                                      |             |       | Trace element solution SL-6<br>(refer to DSMZ medium 27) | 0.05 mL |
| Trace element solution SL-6<br>(refer to DSMZ medium 27)                         | 1.0 mL                                        |                                      |                                      |             |       | Distilled water                                          | 1.0 L   |
| Distilled water                                                                  | 1.0 L                                         |                                      |                                      |             |       |                                                          |         |

\* formula same as the DSMZ medium 27 used for phototrophic growth of *Rhodobacter capsulatus*, *Rhodobacter sphaeroides*, *Rhodospseudomonas palustris*, *Rhodospirillum rubrum* and *Rubrivivax gelatinosus*.

# based on the low nutrient DSMZ medium 830 used for slowly growing heterotrophic freshwater bacteria.

(B)

| Growth medium<br>(agar plates)                                                                     | Anoxic (<0.2% O <sub>2</sub> atmosphere) |                  | Semi-oxic (~10% O <sub>2</sub> atmosphere) |                  | Oxic (normal atmosphere) |                  |
|----------------------------------------------------------------------------------------------------|------------------------------------------|------------------|--------------------------------------------|------------------|--------------------------|------------------|
|                                                                                                    | Dark                                     | Light/Dark cycle | Dark                                       | Light/Dark cycle | Dark                     | Light/Dark cycle |
| 1. Rhodospirillaceae medium                                                                        | -                                        | -                | -                                          | -                | -                        | -                |
| 2. supplemented with 10 mM NaHCO <sub>3</sub> and electron donors*                                 | -                                        | -                | -                                          | -                | -                        | -                |
| 3. supplemented with organic carbon sources#                                                       | -                                        | -                | +++                                        | +++              | +                        | +                |
| 4. R <sub>2</sub> A medium 1/2 strength                                                            | -                                        | -                | +++                                        | +++              | +                        | +                |
| 5. Full strength                                                                                   | -                                        | -                | ++++                                       | ++++             | +                        | +                |
| 6. 2x strength                                                                                     | -                                        | -                | +                                          | +                | -                        | -                |
| 7. R <sub>2</sub> A <sup>+</sup> medium                                                            | -                                        | -                | +++++                                      | +++++            | +                        | +                |
| 8. without organic carbon sources*                                                                 | -                                        | -                | -                                          | -                | -                        | -                |
| 9. without main carbon sources but supplemented with 10 mM NaHCO <sub>3</sub> and electron donors* | -                                        | -                | -                                          | -                | -                        | -                |

\*electron donors: 10 mM Na<sub>2</sub>S + 5 mM Na<sub>2</sub>S<sub>2</sub>O<sub>3</sub> + 5 mM Na<sub>2</sub>SO<sub>3</sub>. Na<sub>2</sub>S<sub>2</sub>O<sub>3</sub> and Na<sub>2</sub>SO<sub>3</sub> were used because a sulfite dehydrogenase and a thiosulfate reductase were identified on Contig\_1 (171948 to 173767) and on Contig\_7 (226357 to 225716), respectively.

#organic carbon sources: Glucose (0.5 g/L) + Proteose peptone (0.5 g/L)

**Table S2 Next generation sequencing (NGS) reads and assembly statistics.**

| <b>NGS Platform</b>        |                             |                |
|----------------------------|-----------------------------|----------------|
| <i>Illumina HiSeq 2000</i> | PE reads number             | 12,655,514 x 2 |
|                            | PE insert length            | 300 bp         |
|                            | Read length                 | 101 bp         |
|                            | Total bases                 | 2,556,413,828  |
| <i>454 GS-FLX plus</i>     | Total reads number          | 271,457        |
|                            | average length              | 786.91         |
|                            | Total bases                 | 213,611,616    |
| <b>Final Assembly</b>      |                             |                |
|                            | Assembly size               | 4,706,869 bp   |
|                            | Number of contigs (>1.5 kb) | 7              |
|                            | Largest contig              | 1,223,592 bp   |
|                            | Smallest contig             | 287,047 bp     |
|                            | N50                         | 654,361 bp     |
|                            | G+C content                 | 64.4%          |
|                            | Number of predicted genes   | 4,061          |
|                            | 5S rRNA                     | 1              |
|                            | 16S rRNA                    | 1              |
|                            | 23S rRNA                    | 1              |
|                            | tRNA genes                  | 47             |
| <b>Contig Length</b>       |                             |                |
|                            | Contig_1                    | 1,223,592 bp   |
|                            | Contig_2                    | 919,971 bp     |
|                            | Contig_3                    | 654,361 bp     |
|                            | Contig_4                    | 651,628 bp     |
|                            | Contig_5                    | 621,492 bp     |
|                            | Contig_6                    | 348,778 bp     |
|                            | Contig_7                    | 287,047 bp     |



**Table S3 Top BLAST hits of 43 selected housekeeping genes from AP64 genome.** For rRNA genes, the blastn algorithm was used; for protein encoding genes, the blastp algorithm was used.

| Category                                 | Gene encoding                      | Gene symbol  | Located contig | Start Position | Stop Position | Gene Length (bp)          | Organism                         | BLAST hit with the highest score |                  |           |          |
|------------------------------------------|------------------------------------|--------------|----------------|----------------|---------------|---------------------------|----------------------------------|----------------------------------|------------------|-----------|----------|
|                                          |                                    |              |                |                |               |                           |                                  | (sub-)Phylum                     | Score            | E-value   | Identity |
| rRNA                                     | 5S rRNA                            |              | Contig_6       | 5145           | 5263          | 119                       | <i>G. aurantiaca</i> T-27        | Gemmatimonadetes                 | 198              | 6.00E-48  | 97%      |
|                                          | 16S rRNA                           | ssu          | Contig_6       | 209            | 1,733         | 1,525                     | <i>G. aurantiaca</i> T-27        | Gemmatimonadetes                 | 2490             | 0         | 96%      |
|                                          | 23S rRNA                           | lsu          | Contig_6       | 2,053          | 4,995         | 2,943                     | <i>G. aurantiaca</i> T-27        | Gemmatimonadetes                 | 4726             | 0         | 96%      |
| DNA replication                          | DNA gyrase subunit A               | gyrA, copy1  | Contig_1       | 1,030,210      | 1,032,642     | 2,433                     | <i>G. aurantiaca</i> T-27        | Gemmatimonadetes                 | 808              | 0         | 50%      |
|                                          |                                    | gyrA, copy2  | Contig_2       | 859,102        | 861,657       | 2,556                     | <i>G. aurantiaca</i> T-27        | Gemmatimonadetes                 | 1451             | 0         | 88%      |
|                                          | DNA gyrase subunit B               | gyrB         | Contig_4       | 265,862        | 267,826       | 1,965                     | <i>G. aurantiaca</i> T-27        | Gemmatimonadetes                 | 1168             | 0         | 89%      |
| Transcription                            | RNA polymerase sigma factor D      | rpoD, copy1  | Contig_4       | 394490         | 393603        | 888                       | <i>G. aurantiaca</i> T-27        | Gemmatimonadetes                 | 568              | 0         | 100%     |
|                                          |                                    | rpoD, copy2  | Contig_4       | 523717         | 524625        | 909                       | <i>G. aurantiaca</i> T-27        | Gemmatimonadetes                 | 571              | 0         | 97%      |
|                                          |                                    | rpoD, copy3  | Contig_5       | 194311         | 195171        | 861                       | <i>G. aurantiaca</i> T-27        | Gemmatimonadetes                 | 522              | 0         | 94%      |
|                                          | RNA polymerase sigma factor E      | rpoE, copy1  | Contig_1       | 941412         | 940897        | 516                       | <i>G. aurantiaca</i> T-27        | Gemmatimonadetes                 | 257              | 2.00E-84  | 72%      |
|                                          |                                    | rpoE, copy2  | Contig_2       | 98375          | 97731         | 645                       | <i>G. aurantiaca</i> T-27        | Gemmatimonadetes                 | 371              | 3.00E-128 | 94%      |
|                                          |                                    | rpoE, copy3  | Contig_2       | 175990         | 175487        | 504                       | <i>G. aurantiaca</i> T-27        | Gemmatimonadetes                 | 226              | 7.00E-72  | 67%      |
| Transcription elongation factor GreA     |                                    | Contig_1     | 736360         | 736845         | 486           | <i>G. aurantiaca</i> T-27 | Gemmatimonadetes                 | 267                              | 8.00E-89         | 87%       |          |
| Translation                              | Translation initiation factor 1    | infA, copy1  | Contig_1       | 449757         | 449554        | 204                       | <i>G. aurantiaca</i> T-27        | Gemmatimonadetes                 | 124              | 4.00E-35  | 90%      |
|                                          |                                    | infA, copy2  | Contig_3       | 467349         | 467570        | 222                       | <i>Magnetospirillum</i> sp. SO-1 | Alphaproteobacteria              | 110              | 6.00E-30  | 74%      |
|                                          | Translation initiation factor 2    | infB         | Contig_5       | 603786         | 606794        | 3009                      | <i>G. aurantiaca</i> T-27        | Gemmatimonadetes                 | 1539             | 0         | 80%      |
|                                          | Translation initiation factor 3    | infC         | Contig_6       | 97949          | 98404         | 456                       | <i>G. aurantiaca</i> T-27        | Gemmatimonadetes                 | 285              | 1.00E-95  | 95%      |
|                                          | Translation elongation factor G    | -            | Contig_2       | 832701         | 834797        | 2097                      | <i>G. aurantiaca</i> T-27        | Gemmatimonadetes                 | 1234             | 0         | 86%      |
|                                          | Translation elongation factor LepA | -            | Contig_3       | 418061         | 416265        | 1797                      | <i>G. aurantiaca</i> T-27        | Gemmatimonadetes                 | 1124             | 0         | 95%      |
|                                          | Translation elongation factor P    | -            | Contig_3       | 475036         | 475569        | 534                       | <i>G. aurantiaca</i> T-27        | Gemmatimonadetes                 | 347              | 1.00E-119 | 94%      |
|                                          | Translation elongation factor Tu   | -            | Contig_4       | 206457         | 205255        | 1203                      | <i>G. aurantiaca</i> T-27        | Gemmatimonadetes                 | 768              | 0         | 96%      |
|                                          | Translation elongation factor G    | -            | Contig_4       | 208620         | 206500        | 2121                      | <i>G. aurantiaca</i> T-27        | Gemmatimonadetes                 | 1355             | 0         | 96%      |
|                                          | Translation elongation factor Ts   | -            | Contig_6       | 139582         | 140463        | 882                       | <i>G. aurantiaca</i> T-27        | Gemmatimonadetes                 | 495              | 2.00E-174 | 85%      |
|                                          | Aspartyl-tRNA synthetase           | -            | Contig_6       | 200702         | 202522        | 1821                      | <i>G. aurantiaca</i> T-27        | Gemmatimonadetes                 | 1057             | 0         | 88%      |
|                                          | Leucyl-tRNA synthetase             | -            | Contig_2       | 889433         | 891865        | 2433                      | <i>G. aurantiaca</i> T-27        | Gemmatimonadetes                 | 1438             | 0         | 85%      |
|                                          | Tryptophanyl-tRNA synthetase       | -            | Contig_4       | 188736         | 187684        | 1053                      | <i>G. aurantiaca</i> T-27        | Gemmatimonadetes                 | 569              | 0         | 86%      |
|                                          | Tyrosyl-tRNA synthetase            | -            | Contig_4       | 468195         | 469481        | 1287                      | <i>G. aurantiaca</i> T-27        | Gemmatimonadetes                 | 648              | 0         | 77%      |
|                                          | Valyl-tRNA synthetase              | -            | Contig_5       | 324199         | 321539        | 2661                      | <i>G. aurantiaca</i> T-27        | Gemmatimonadetes                 | 1571             | 0         | 86%      |
|                                          | DNA repair                         | RecA protein | recA, copy1    | Contig_1       | 937148        | 935892                    | 1257                             | <i>G. aurantiaca</i> T-27        | Gemmatimonadetes | 302       | 8.00E-96 |
| recA, copy2                              |                                    |              | Contig_6       | 57395          | 58471         | 1077                      | <i>G. aurantiaca</i> T-27        | Gemmatimonadetes                 | 617              | 0         | 92%      |
| ATP-dependent DNA helicase               |                                    | recQ, copy1  | Contig_4       | 72400          | 73965         | 1566                      | <i>G. aurantiaca</i> T-27        | Gemmatimonadetes                 | 873              | 0         | 85%      |
|                                          |                                    | recQ, copy2  | Contig_6       | 217301         | 219097        | 1797                      | <i>G. aurantiaca</i> T-27        | Gemmatimonadetes                 | 790              | 0         | 67%      |
| DNA recombination and repair protein     |                                    | recF         | Contig_4       | 264250         | 265380        | 1131                      | <i>G. aurantiaca</i> T-27        | Gemmatimonadetes                 | 568              | 0         | 78%      |
| Recombination protein                    |                                    | recR         | Contig_5       | 84314          | 84904         | 591                       | <i>G. aurantiaca</i> T-27        | Gemmatimonadetes                 | 322              | 2.00E-109 | 83%      |
| DNA recombination and repair protein     |                                    | recO         | Contig_5       | 516323         | 517045        | 723                       | <i>G. aurantiaca</i> T-27        | Gemmatimonadetes                 | 325              | 9.00E-109 | 67%      |
| Regulatory protein                       |                                    | recX         | Contig_6       | 58587          | 59243         | 657                       | <i>G. aurantiaca</i> T-27        | Gemmatimonadetes                 | 210              | 3.00E-65  | 63%      |
| Single stranded DNA specific exonuclease |                                    | recJ         | Contig_6       | 87719          | 89404         | 1686                      | <i>G. aurantiaca</i> T-27        | Gemmatimonadetes                 | 842              | 0         | 77%      |
| DNA repair protein                       |                                    | recN         | Contig_6       | 111305         | 113047        | 1743                      | <i>G. aurantiaca</i> T-27        | Gemmatimonadetes                 | 761              | 0         | 70%      |
| Excinuclease ABC subunit A               |                                    | uvrA, copy1  | Contig_3       | 389193         | 386353        | 2841                      | <i>G. aurantiaca</i> T-27        | Gemmatimonadetes                 | 1612             | 0         | 84%      |
|                                          |                                    | uvrA, copy2  | Contig_4       | 249824         | 246936        | 2889                      | <i>G. aurantiaca</i> T-27        | Gemmatimonadetes                 | 1737             | 0         | 90%      |
| Excinuclease ABC subunit B               |                                    | uvrB         | Contig_6       | 12496          | 14595         | 2100                      | <i>G. aurantiaca</i> T-27        | Gemmatimonadetes                 | 1258             | 0         | 92%      |
| Excinuclease ABC subunit C               |                                    | uvrC, copy1  | Contig_6       | 319342         | 317354        | 1989                      | <i>G. aurantiaca</i> T-27        | Gemmatimonadetes                 | 1035             | 0         | 82%      |
|                                          |                                    | uvrC, copy2  | Contig_3       | 154524         | 153349        | 1176                      | <i>G. aurantiaca</i> T-27        | Gemmatimonadetes                 | 595              | 0         | 85%      |
|                                          |                                    | uvrC, copy3  | Contig_7       | 232926         | 233978        | 1053                      | <i>G. aurantiaca</i> T-27        | Gemmatimonadetes                 | 540              | 0         | 78%      |
| ATP production                           | ATP synthase A chain               | atpA         | Contig_3       | 79947          | 80903         | 957                       | <i>G. aurantiaca</i> T-27        | Gemmatimonadetes                 | 466              | 9.00E-162 | 74%      |
|                                          | ATP synthase C chain               | atpC         | Contig_3       | 81077          | 81355         | 279                       | <i>G. aurantiaca</i> T-27        | Gemmatimonadetes                 | 169              | 2.00E-52  | 96%      |
|                                          | ATP synthase delta chain           | atpD         | Contig_3       | 82018          | 82575         | 558                       | <i>G. aurantiaca</i> T-27        | Gemmatimonadetes                 | 279              | 1.00E-92  | 78%      |
|                                          | ATP synthase epsilon chain         | atpE         | Contig_4       | 387254         | 386994        | 261                       | <i>G. aurantiaca</i> T-27        | Gemmatimonadetes                 | 151              | 2.00E-45  | 90%      |
|                                          | ATP synthase beta chain            | atpB         | Contig_4       | 388688         | 387258        | 1431                      | <i>G. aurantiaca</i> T-27        | Gemmatimonadetes                 | 894              | 0         | 96%      |
|                                          | ATP synthase gamma chain           | atpG         | Contig_4       | 389587         | 388715        | 873                       | <i>G. aurantiaca</i> T-27        | Gemmatimonadetes                 | 442              | 2.00E-153 | 77%      |
|                                          | ATP synthase alpha chain           | atpA         | Contig_4       | 391170         | 389599        | 1572                      | <i>G. aurantiaca</i> T-27        | Gemmatimonadetes                 | 960              | 0         | 94%      |
|                                          |                                    |              |                |                |               |                           |                                  |                                  |                  |           |          |
| others                                   | Chaperone protein DnaK             | dnaK         | Contig_3       | 241319         | 239382        | 1938                      | <i>G. aurantiaca</i> T-27        | Gemmatimonadetes                 | 1164             | 0         | 92%      |
|                                          | Chaperone protein DnaJ             | dnaJ, copy1  | Contig_5       | 89990          | 91135         | 1146                      | <i>G. aurantiaca</i> T-27        | Gemmatimonadetes                 | 658              | 0         | 84%      |
|                                          |                                    | dnaJ, copy2  | Contig_6       | 78359          | 79492         | 1134                      | <i>G. aurantiaca</i> T-27        | Gemmatimonadetes                 | 690              | 0         | 88%      |
|                                          | Heat shock protein, Hsp20 family   | -            | Contig_3       | 596899         | 596441        | 459                       | <i>G. aurantiaca</i> T-27        | Gemmatimonadetes                 | 119              | 7.00E-31  | 45%      |

**Table S4 Top blastp hits of proteins annotated in the photosynthesis gene cluster of AP64.** Genes are listed in the same order as their positions in the PGC.

| Gene function                                                                   | Gene symbol | Located contig | Start position | Stop position | Gene Length (bp) | BLASTP hit with the highest score           |                     |       |           |          |
|---------------------------------------------------------------------------------|-------------|----------------|----------------|---------------|------------------|---------------------------------------------|---------------------|-------|-----------|----------|
|                                                                                 |             |                |                |               |                  | Organism                                    | (sub-)Phylum        | Score | E-value   | Identity |
| Geranylgeranyl hydrogenase                                                      | bchP        | Contig_5       | 107030         | 105762        | 1269             | <i>Bradyrhizobium sp.</i> STM 3809          | Alphaproteobacteria | 533   | 0         | 66%      |
| Bacteriochlorophyll synthase 44.5 kDa chain                                     | bch2        | Contig_5       | 108385         | 107027        | 1359             | <i>Rubrivivax benzoatilyticus</i>           | Betaproteobacteria  | 392   | 5.00E-129 | 50%      |
| Bacteriochlorophyll a synthase                                                  | bchG        | Contig_5       | 109296         | 108385        | 912              | <i>Rubrivivax gelatinosus</i> IL144         | Betaproteobacteria  | 371   | 2.00E-125 | 62%      |
| Transcriptional regulator                                                       | ppsR        | Contig_5       | 110882         | 109437        | 1446             | <i>Ectothiorhodospira sp.</i> PHS-1         | Gammaproteobacteria | 442   | 1.00E-147 | 49%      |
| Heme-binding SCHIC domain protein, putative oxygen sensor                       | aerR        | Contig_5       | 111723         | 110848        | 876              | <i>Rhodospirillum centenum</i> SW           | Alphaproteobacteria | 184   | 3.00E-53  | 43%      |
| 2-vinyl bacteriochlorophyllide hydratase                                        | bchF        | Contig_5       | 111998         | 112561        | 564              | <i>Rhodomicrobium vannielii</i> ATCC 17100  | Alphaproteobacteria | 203   | 6.00E-63  | 67%      |
| Light-independent protochlorophyllide reductase subunit N                       | bchN        | Contig_5       | 112558         | 113811        | 1254             | <i>Pseudanabaena biceps</i>                 | Cyanobacteria       | 645   | 0         | 75%      |
| Light-independent protochlorophyllide reductase subunit B                       | bchB        | Contig_5       | 113816         | 115558        | 1743             | <i>Pseudanabaena biceps</i>                 | Cyanobacteria       | 758   | 0         | 67%      |
| Protoporphyrin IX Mg-chelatase subunit H                                        | bchH        | Contig_5       | 115575         | 119375        | 3801             | <i>Rhodospirillum centenum</i> SW           | Alphaproteobacteria | 1387  | 0         | 56%      |
| Light-independent protochlorophyllide reductase iron-sulfur ATP-binding protein | bchL        | Contig_5       | 119434         | 120321        | 888              | <i>Synechococcus sp.</i> CB0205             | Cyanobacteria       | 508   | 3.00E-179 | 87%      |
| Mg-protoporphyrin O-methyltransferase                                           | bchM        | Contig_5       | 120402         | 121121        | 720              | <i>Rubrivivax gelatinosus</i> IL144         | Betaproteobacteria  | 278   | 1.00E-90  | 64%      |
| hypothetical protein                                                            | -           | Contig_5       | 121152         | 121484        | 333              | <i>Rhodovulum sp.</i> PH10                  | Alphaproteobacteria | 91.3  | 2.00E-21  | 49%      |
| Mg protoporphyrin IX monomethyl ester oxidative cyclase (aerobic)               | acsF        | Contig_5       | 121530         | 122582        | 1053             | <i>Methylobacterium sp.</i> 88A             | Alphaproteobacteria | 430   | 9.00E-147 | 57%      |
| light-harvesting 1 complex assembly protein                                     | lhaA        | Contig_5       | 122611         | 124056        | 1446             | <i>Thiorhodospira sibirica</i>              | Gammaproteobacteria | 488   | 2.00E-165 | 54%      |
| Photosynthetic reaction center subunit                                          | puhA        | Contig_5       | 124086         | 124289        | 204              | <i>Thermochromatium tepidum</i>             | Gammaproteobacteria | 76.3  | 2.00E-15  | 58%      |
| Photosynthetic reaction center subunit                                          | puhB        | Contig_5       | 124289         | 124834        | 546              | <i>Thiocapsa marina</i>                     | Gammaproteobacteria | 186   | 2.00E-55  | 50%      |
| Photosynthetic complex assembly protein                                         | puhC        | Contig_5       | 124837         | 125511        | 675              | <i>Methylobacterium sp.</i> MB200           | Alphaproteobacteria | 156   | 2.00E-43  | 40%      |
| hypothetical protein                                                            | -           | Contig_5       | 125514         | 126059        | 546              | <i>Rhodopseudomonas palustris</i> BisB18    | Alphaproteobacteria | 103   | 1.00E-24  | 36%      |
| hypothetical protein                                                            | -           | Contig_5       | 127958         | 126144        | 1815             | <i>Mycobacterium tuberculosis</i>           | Actinobacteria      | 115   | 1.00E-09  | 28%      |
| hypothetical protein                                                            | -           | Contig_5       | 129306         | 127969        | 1338             | <i>Conexibacter woesei</i> DSM 14684        | Actinobacteria      | 102   | 2.00E-07  | 28%      |
| Putative kinase protein                                                         | -           | Contig_5       | 130777         | 129356        | 1422             | <i>Arthrospira sp.</i> PCC 8005             | Cyanobacteria       | 340   | 5.00E-108 | 41%      |
| hypothetical protein                                                            | -           | Contig_5       | 131881         | 130784        | 1098             | <i>Desulfotomaculum acetoxidans</i> DSM 771 | Firmicutes          | 97.8  | 2.00E-19  | 28%      |
| hypothetical protein                                                            | -           | Contig_5       | 132526         | 131885        | 642              | <i>Arthrospira platensis</i> NIES-39        | Cyanobacteria       | 233   | 9.00E-74  | 53%      |
| Photosynthetic reaction center cytochrome c subunit                             | pufC        | Contig_5       | 133815         | 132718        | 1098             | <i>Limnohabitans sp.</i> Rim47              | Betaproteobacteria  | 281   | 3.00E-88  | 44%      |
| Photosynthetic reaction center M subunit                                        | pufM        | Contig_5       | 134915         | 133812        | 1104             | <i>Luminiphilus sylvensis</i>               | Gammaproteobacteria | 495   | 2.00E-172 | 71%      |
| Photosynthetic reaction center L subunit                                        | pufL        | Contig_5       | 135752         | 134928        | 825              | <i>Lamprocystis purpurea</i>                | Gammaproteobacteria | 494   | 1.00E-174 | 79%      |
| light-harvesting LHI alpha subunit                                              | pufA        | Contig_5       | 136119         | 135922        | 198              | <i>Thiocapsa roseopersicina</i>             | Gammaproteobacteria | 67.8  | 2.00E-13  | 51%      |
| light-harvesting LHI beta subunit                                               | pufB        | Contig_5       | 136473         | 136339        | 135              | <i>Limnohabitans sp.</i> Rim28              | Betaproteobacteria  | 60.1  | 7.00E-11  | 56%      |
| Predicted hydrolases or acyltransferases                                        | -           | Contig_5       | 136851         | 137522        | 672              | <i>Elioraea tepidiphila</i>                 | Alphaproteobacteria | 160   | 3.00E-44  | 44%      |
| Chlorophyllide reductase subunit Z                                              | bchZ        | Contig_5       | 139086         | 137629        | 1458             | <i>Rhodospirillum centenum</i> SW           | Alphaproteobacteria | 816   | 0         | 83%      |
| Chlorophyllide reductase subunit Y                                              | bchY        | Contig_5       | 140723         | 139086        | 1638             | <i>Rhodopseudomonas palustris</i> BisB18    | Alphaproteobacteria | 829   | 0         | 80%      |
| Chlorophyllide reductase subunit X                                              | bchX        | Contig_5       | 141742         | 140747        | 996              | <i>Limnohabitans sp.</i> Rim47              | Betaproteobacteria  | 568   | 0         | 88%      |
| 2-desacetyl-2-hydroxyethyl bacteriochlorophyllide a dehydrogenase               | bchC        | Contig_5       | 142692         | 141739        | 954              | <i>Thiorhodovibrio sp.</i> 970              | Gammaproteobacteria | 390   | 5.00E-132 | 60%      |
| Hydroxyneurosporene methyltransferase                                           | crtF        | Contig_5       | 144109         | 142880        | 1230             | <i>Methyloversatilis universalis</i>        | Betaproteobacteria  | 362   | 1.00E-118 | 52%      |
| Protoporphyrin IX Mg-chelatase subunit I                                        | bchI        | Contig_5       | 144318         | 145343        | 1026             | <i>Rhodopseudomonas palustris</i> BisA53    | Alphaproteobacteria | 471   | 3.00E-163 | 71%      |
| Protoporphyrin IX Mg-chelatase subunit D                                        | bchD        | Contig_5       | 145324         | 147201        | 1878             | <i>Thioflavicoccus mobilis</i> 8321         | Gammaproteobacteria | 479   | 2.00E-158 | 47%      |
| Photosynthetic complex assembly protein 2                                       | pufE        | Contig_5       | 147198         | 148103        | 906              | <i>Fulvimarina pelagi</i>                   | Alphaproteobacteria | 113   | 8.00E-25  | 28%      |

**Table S5 A complete list of enzymes involved in the bacteriochlorophyll biosynthesis pathway predicted from AP64 genome with *Gemmatimonas aurantiaca* T-27 as comparison.**

| Step in the pathway                                           | Enzyme                                                                                                 | Gene symbol | Located contig | inside (●) / outside (○) PGC | Start position | Stop position | Gene length (bp) | Homolog presence in <i>G. aurantiaca</i> T-27, protein identity |
|---------------------------------------------------------------|--------------------------------------------------------------------------------------------------------|-------------|----------------|------------------------------|----------------|---------------|------------------|-----------------------------------------------------------------|
| 1. L-Glutamate → L-Glutamyl-tRNA                              | Glutamyl-tRNA synthetase (EC 6.1.1.17)                                                                 | gltX        | Contig_5       | ○                            | 303631         | 302168        | 1464             | +, 78% (378/484)                                                |
| 2. → Glutamate-1-semialdehyde                                 | Glutamyl-tRNA reductase (EC 1.2.1.70)                                                                  | hemA        | Contig_5       | ○                            | 105736         | 104273        | 1464             | +, 28% (82/291)                                                 |
| 3. → 5-Amino-levulinate                                       | Glutamate-1-semialdehyde 2,1-aminomutase (EC 5.4.3.8)                                                  | hemL, copy1 | Contig_3       | ○                            | 572761         | 573999        | 1239             | +, 83% (355/425)                                                |
|                                                               |                                                                                                        | hemL, copy2 | Contig_5       | ○                            | 197160         | 198473        | 1314             | +, 83% (355/425)                                                |
| 4. → Porphobilinogen                                          | Porphobilinogen synthase (EC 4.2.1.24)                                                                 | hemB        | Contig_1       | ○                            | 1127978        | 1128973       | 996              | +, 82% (265/321)                                                |
| 5. → Hydroxymethyl-bilane                                     | Hydroxymethylbilane synthase (EC 2.5.1.61)                                                             | hemC        | Contig_1       | ○                            | 1126983        | 1127981       | 999              | +, 77% (238/308)                                                |
| 6. → Uroporphyrinogen III                                     | Uroporphyrinogen III synthase (EC 4.2.1.75)                                                            | hemD        | Contig_1       | ○                            | 1126029        | 1126808       | 780              | +, 74% (186/252)                                                |
| 7. → Coproporphyrinogen III                                   | Uroporphyrinogen III decarboxylase (EC 4.1.1.37)                                                       | hemE        | Contig_5       | ○                            | 104158         | 103064        | 1095             | +, 82% (290/351)                                                |
| 8. → Protoporphyrinogen IX                                    | Coproporphyrinogen oxidase ( <b>Aerobic</b> , EC 1.3.3.3)                                              | hemF        | Contig_5       | ○                            | 103067         | 102072        | 996              | +, 78% (240/307)                                                |
|                                                               | Coproporphyrinogen dehydrogenase ( <b>Anaerobic</b> , EC 1.3.99.22)                                    | hemN        | Contig_7       | ○                            | 243281         | 244645        | 1365             | +, 62% (275/442)                                                |
| 9. → Protoporphyrin IX                                        | Protoporphyrinogen oxidase ( <b>Aerobic</b> , EC 1.3.3.4)                                              | hemY        | Contig_5       | ○                            | 102062         | 100596        | 1467             | -                                                               |
|                                                               | Protoporphyrinogen IX dehydrogenase ( <b>Anaerobic</b> , EC 1.3.5.3)                                   | hemG        | Contig_7       | ○                            | 245270         | 245704        | 435              | +, 71% (98/138)                                                 |
| 10. → Mg-protoporphyrin IX                                    | Magnesium chelatase subunit I (EC 6.6.1.1)                                                             | bchI, copy1 | Contig_5       | ●                            | 144318         | 145343        | 1026             | +, 86% (418/482)                                                |
|                                                               |                                                                                                        | bchI, copy2 | Contig_4       | ○                            | 543911         | 545365        | 1455             | +, 86% (418/482)                                                |
|                                                               | Magnesium chelatase subunit D (EC 6.6.1.1)                                                             | bchD        | Contig_5       | ●                            | 145324         | 147201        | 1878             | -                                                               |
|                                                               | Magnesium chelatase subunit H (EC 6.6.1.1)                                                             | bchH        | Contig_5       | ●                            | 115575         | 119375        | 3801             | -                                                               |
| 11. → Mg-protoporphyrin IX 13-methyl ester                    | Mg-protoporphyrin IX methyltransferase (EC 2.1.1.11)                                                   | bchM        | Contig_5       | ●                            | 120402         | 121121        | 720              | -                                                               |
| 12. → Divinylprotochlorophyllide                              | Mg-protoporphyrin IX monomethyl ester oxidative cyclase ( <b>Aerobic</b> , EC 1.14.13.81)              | acsF        | Contig_5       | ●                            | 121530         | 122582        | 1053             | -                                                               |
|                                                               | Mg-protoporphyrin IX monomethyl ester oxidative cyclase ( <b>Anaerobic</b> )                           | bchE        | Contig_7       | ○                            | 241690         | 243291        | 1602             | -                                                               |
| 13. → Protochlorophyllide                                     | Divinyl chlorophyllide a 8-vinyl-reductase (EC 1.3.1.75)                                               | bciA*       | Contig_2       | ○                            | 338640         | 339923        | 1284             | -                                                               |
| 14. → Chlorophyllide a                                        | Protochlorophyllide reductase ( <u>Light-dependent</u> , EC 1.3.1.33)                                  | -           | Contig_1       | ○                            | 675051         | 674083        | 969              | -                                                               |
|                                                               | Protochlorophyllide reductase iron-sulfur ATP-binding protein ( <u>Light-independent</u> , EC 1.3.7.7) | bchL        | Contig_5       | ●                            | 119434         | 120321        | 888              | -                                                               |
|                                                               | Protochlorophyllide reductase subunit N ( <u>Light-independent</u> , EC 1.3.7.7)                       | bchN        | Contig_5       | ●                            | 112558         | 113811        | 1254             | -                                                               |
|                                                               | Protochlorophyllide reductase subunit B ( <u>Light-independent</u> , EC 1.3.7.7)                       | bchB        | Contig_5       | ●                            | 113816         | 115558        | 1743             | -                                                               |
| 15. → 3-Vinyl-bacteriochlorophyllide a                        | Chlorophyllide a reductase subunit X                                                                   | bchX        | Contig_5       | ●                            | 141742         | 140747        | 996              | -                                                               |
|                                                               | Chlorophyllide a reductase subunit Y                                                                   | bchY        | Contig_5       | ●                            | 140723         | 139086        | 1638             | -                                                               |
|                                                               | Chlorophyllide a reductase subunit Z                                                                   | bchZ        | Contig_5       | ●                            | 139086         | 137629        | 1458             | -                                                               |
| 16. → 3-Hydroxyethyl-bacteriochlorophyllide a                 | 3-vinyl bacteriochlorophyllide a hydratase                                                             | bchF        | Contig_5       | ●                            | 111998         | 112561        | 564              | -                                                               |
| 17. → Bacteriochlorophyllide a                                | 3-Hydroxyethyl-bacteriochlorophyllide a dehydrogenase                                                  | bchC        | Contig_5       | ●                            | 142692         | 141739        | 954              | -                                                               |
| 18. → Bacteriochlorophyll a (esterified with geranylgeraniol) | Bacteriochlorophyll synthase (EC 2.5.1.62)                                                             | bchG        | Contig_5       | ●                            | 109296         | 108385        | 912              | -                                                               |
| 19. → Bacteriochlorophyll a (esterified with phytol)          | Geranylgeranyl reductase                                                                               | bchP        | Contig_5       | ●                            | 107030         | 105762        | 1269             | -                                                               |

\* annotated as *bciA* rather than *bchJ* based on Saunders *et al.* Biochemistry (2013) 52, 8442-8451 and Canniffe *et al.* Biochem. J. (2013) 450, 397-405

**Table S6 Carotenoid biosynthesis enzymes annotated in AP64 genome and their top blastp hits in GenBank.**

| Contig   | Start position | Stop position | Gene length (bp) | Enzyme                                            | Gene        | inside (●) / outside (○) PGC | The top-score BlastP hit in GenBank database |                           |                  |
|----------|----------------|---------------|------------------|---------------------------------------------------|-------------|------------------------------|----------------------------------------------|---------------------------|------------------|
|          |                |               |                  |                                                   |             |                              | Accession no.                                | Species                   | Protein identity |
| Contig_6 | 38622          | 39626         | 1005             | Geranylgeranyl diphosphate synthase (EC 2.5.1.29) | <i>crtE</i> | ○                            | YP_002761444                                 | <i>G. aurantiaca</i> T-27 | 281/334 (84%)    |
| Contig_2 | 841179         | 842276        | 1098             | Phytoene synthase (EC 2.5.1.32), copy_1           | <i>crtB</i> | ○                            | YP_002759973                                 | <i>G. aurantiaca</i> T-27 | 299/352 (85%)    |
| Contig_3 | 189833         | 188781        | 1053             | Phytoene synthase (EC 2.5.1.32), copy_2           | <i>crtB</i> | ○                            | YP_002761918                                 | <i>G. aurantiaca</i> T-27 | 178/294 (61%)    |
| Contig_3 | 187341         | 185827        | 1515             | Phytoene dehydrogenase (EC 1.14.99.-)             | <i>crtI</i> | ○                            | YP_002761920                                 | <i>G. aurantiaca</i> T-27 | 368/486 (76%)    |
| Contig_3 | 188768         | 187806        | 963              | Carotenoid 1,2-hydratase                          | <i>cruF</i> | ○                            | YP_002761919                                 | <i>G. aurantiaca</i> T-27 | 191/288 (66%)    |
| Contig_5 | 403532         | 404725        | 1194             | Carotenoid 2-O-rhamnosyltransferase               | <i>cruG</i> | ○                            | YP_002760890                                 | <i>G. aurantiaca</i> T-27 | 251/382 (66%)    |
| Contig_5 | 144109         | 142880        | 1230             | Carotenoid O-methyltransferase                    | <i>crtF</i> | ●                            | WP_020165693                                 | <i>M. universalis</i>     | 194/379 (51%)    |

**Table S7 Enzymes with CO<sub>2</sub> or HCO<sub>3</sub><sup>-</sup> as substrate annotated in AP64 genome with *Gemmatimonnas aurantiaca* T-27 as comparison.**

| Contig   | Start position | Stop position | Gene length (bp) | Enzyme                                                                    | Reaction catalyzed                                                                                                                                              | Reversibility of reaction | Homolog presence in <i>G. aurantiaca</i> T-27, protein identity |
|----------|----------------|---------------|------------------|---------------------------------------------------------------------------|-----------------------------------------------------------------------------------------------------------------------------------------------------------------|---------------------------|-----------------------------------------------------------------|
| Contig_3 | 274975         | 274205        | 771              | carbonic anhydrase (EC 4.2.1.1)                                           | $\text{CO}_2 + \text{H}_2\text{O} \rightleftharpoons \text{HCO}_3^-$                                                                                            | Yes                       | +, 191/249 (77%)                                                |
| Contig_4 | 123359         | 122862        | 498              | carbonic anhydrase (EC 4.2.1.1)                                           |                                                                                                                                                                 |                           | +, 124/160 (78%)                                                |
| Contig_6 | 133104         | 134648        | 1545             | acetyl-CoA carboxylase (EC 6.3.4.14)                                      | $\text{acetyl-CoA} + \text{ATP} + \text{HCO}_3^- \rightleftharpoons \text{malonyl-CoA} + \text{ADP} + \text{P}_i$                                               | Yes                       | +, 443/511 (87%)                                                |
| Contig_6 | 48243          | 49601         | 1359             | biotin carboxylase (EC 6.3.4.14)                                          | $\text{biotin-carboxyl-carrier protein} + \text{ATP} + \text{CO}_2 \rightleftharpoons \text{carboxylbiotin-carboxyl-carrier protein} + \text{ADP} + \text{P}_i$ | Yes                       | +, 432/452 (96%)                                                |
| Contig_7 | 41425          | 38642         | 2784             | phosphoenolpyruvate carboxylase (EC 4.1.1.31)                             | $\text{PEP} + \text{HCO}_3^- + \text{H}_2\text{O} \rightarrow \text{oxaloacetate} + \text{ADP} + \text{P}_i$                                                    | No                        | +, 723/923 (78%)                                                |
| Contig_6 | 136080         | 136592        | 513              | propionyl-CoA carboxylase (EC 6.4.1.3)                                    | $\text{propanoyl-CoA} + \text{ATP} + \text{HCO}_3^- \rightleftharpoons \text{methylmalonyl-CoA} + \text{ADP} + \text{P}_i$                                      | Yes                       | +, 132/170 (78%)                                                |
| Contig_3 | 374162         | 372957        | 1206             | phosphoribosylaminoimidazole carboxylase (EC 4.1.1.21), ATPase subunit    | $5\text{-aminoimidazole ribonucleotide} + \text{CO}_2 \rightleftharpoons$                                                                                       | Yes                       | +, 326/394 (83%)                                                |
| Contig_3 | 374686         | 374159        | 528              | phosphoribosylaminoimidazole carboxylase (EC 4.1.1.21), catalytic subunit | $5'\text{-phosphoribosyl-4-carboxy-5-aminoimidazole} + 2\text{H}^+$                                                                                             |                           | +, 149/169 (88%)                                                |
| Contig_6 | 243675         | 244787        | 1113             | carbamoyl-phosphate synthase (EC 6.3.5.5), small chain                    | $2\text{ATP} + \text{NH}_3 + \text{CO}_2 + \text{H}_2\text{O} \rightarrow$                                                                                      | No                        | +, 309/370 (84%)                                                |
| Contig_3 | 641545         | 644772        | 3228             | carbamoyl-phosphate synthase (EC 6.3.5.5), large chain                    | $2\text{ADP} + \text{phosphate} + \text{carbamoyl-phosphate}$                                                                                                   |                           | +, 967/1072 (90%)                                               |

**Table S8 Gemmatimonadetes-AcsF like sequences in the metagenome database CAMERA and in the NCBI whole genome shotgun (WGS) sequence database.** AP64's AcsF amino acid sequence was used as a query for tblastn searching. The threshold was set as >85% sequence identity.

| BLAST hit                                                           | Description of metagenome project                                                                         | Sequence form    | Total length (bp) | GenBank accession number | Query database | Score | E-value  | Identity (amino acid positions) |
|---------------------------------------------------------------------|-----------------------------------------------------------------------------------------------------------|------------------|-------------------|--------------------------|----------------|-------|----------|---------------------------------|
| Wastewater metagenome HPminus27240.1                                | Sequencing batch reactors (SBR) enriched microbial communities from a Danish wastewater treatment plant   | Assembled contig | 6892              | APMI01036896             | NCBI WGS       | 674   | 0        | 88% (318/362)                   |
| Yellowstone Lake southeast arm water metagenome CAM_READ_0305803473 | Yellowstone Lake metagenome 355:Southeast Arm, YLAKE0355-4F-01-738 Experiment, size fraction 0.1-0.8 µm   | 454 read         | 521               | SRA026894                | CAMERA         | 346   | 3.52E-92 | 93% (162/173)                   |
| Yellowstone Lake southeast arm water metagenome CAM_READ_0306001467 | s.a.a.                                                                                                    | 454 read         | 519               | SRA026894                | CAMERA         | 303   | 5.23E-83 | 94% (141/150)                   |
| Yellowstone Lake southeast arm water metagenome CAM_READ_0305923507 | s.a.a.                                                                                                    | 454 read         | 520               | SRA026894                | CAMERA         | 300   | 8.00E-84 | 93% (140/149)                   |
| Yellowstone Lake southeast arm water metagenome CAM_READ_0307488505 | Yellowstone Lake metagenome 355b:Southeast Arm, YLAKE0355BSM-4F-01-736 Experiment, size fraction 0.8-3 µm | 454 read         | 532               | SRA026894                | CAMERA         | 260   | 6.24E-84 | 93% (121/129)                   |
| Yellowstone Lake southeast arm water metagenome CAM_READ_0314277619 | Yellowstone Lake metagenome 350: Mary Bay Mixing, YLAKE350-4F-01-765 Experiment, size fraction 0.1-0.8 µm | 454 read         | 506               | SRA026871                | CAMERA         | 286   | 9.40E-75 | 88% (135/152)                   |
